# Supplementary material for: Lipid chain-driven interaction of a lipidated Src-family kinase Lyn with the bilayer membrane
Source: Royal Society of Chemistry journal article supplement (doi:10.1039/d2ob01079h), 2022-01-01

## Supporting Information

### **Lipid chain-driven interaction of a lipidated Src-family kinase Lyn with the bilayer membrane**

Shinya Hanashima,<sup>a,\*</sup> Kanako Mito,<sup>a</sup> Yuichi Umegawa,<sup>a</sup> Michio Murata,<sup>a,b</sup> Hironobu Hojo<sup>b,c</sup>

- a. Department of Chemistry, Graduate School of Science, Osaka University, 1-1 Machikaneyama-cho, Toyonaka, Osaka 560-0043, Japan
- b. Forefront Research Center, Graduate School of Science, Osaka University, Toyonaka, Osaka 560-0043, Japan
- c. Institute for Protein Research, Osaka University, Yamadaoka 3-2, Suita 565-0871, Japan

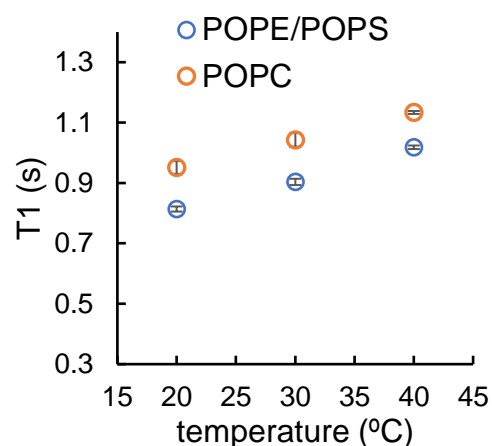

Fig.S1. Temperature-dependent changes of the  $^{31}\text{P}$ -NMR  $T_1$  relaxation times of the POPC/POPE/POPS 50:25:25 membrane without Lyn peptides.

The  $T_1$  relaxation time relates to the following equation expressed with the rotational correlation time ( $\tau_c$ ) and the frequency ( $\omega$ ).

$$\frac{1}{T_1} \propto \frac{\tau_c}{1 + \omega^2 \tau_c^2}$$

$T_1$  can be minimum when  $\omega\tau_c \approx 1$ . Here, membrane phospholipid motion relating to  $\tau_c$  should increase according to increasing temperatures, and the POPC and POPE/POPS signals showed a temperature-dependent increase in the  $T_1$  relaxation times. Therefore, the decrease of  $T_1$  relaxation time in the presence of Lyn peptides means restriction of the phospholipid motion.

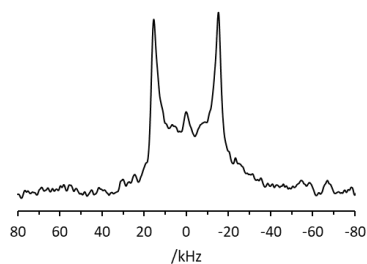

Fig.S2.  $^2\text{H}$  NMR spectrum of the unitary  $10',10'\text{-}d_2\text{-POPC}$  membrane at  $30^\circ\text{C}$ , showing 19.1 kHz.

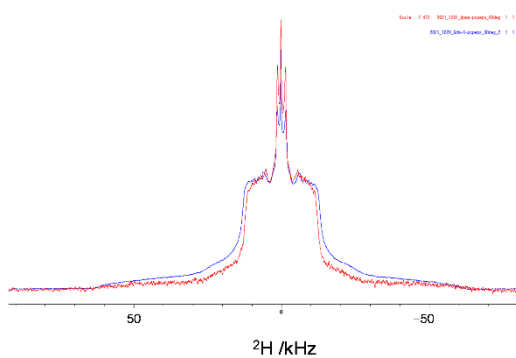

Fig.S3.  $^2\text{H}$  NMR spectra of  $\text{M}_d\text{-Lyn}$  in POPC/POPE/POPS membranes at  $30^\circ\text{C}$  (blue trace) and  $40^\circ\text{C}$  (red trace). The spectrum at  $30^\circ\text{C}$  is also shown in Fig 2D, while the line broadening factor here is larger (150 Hz). The scan number for the blue trace was  $\sim 1,200\text{k}$ , and the red trace was  $\sim 450\text{k}$ , respectively.

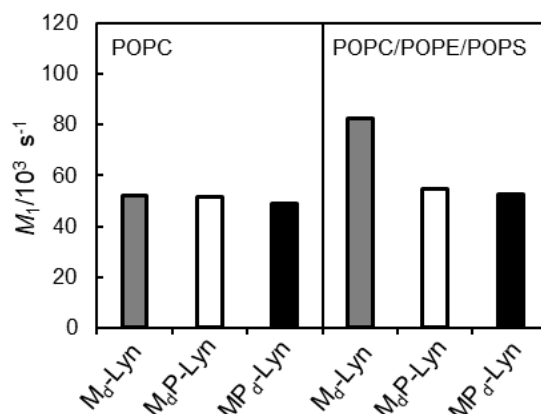

Fig.S4. First moments of the  $d_{27}$ -myristoyl chain or  $d_{31}$ -palmitoyl chain of Lyn-peptides in the POPC and POPC/POPE/POPS membranes at 30°C.

## MATERIALS AND METHODS

### Materials

CLEAR-Amide Resin (100-200 mesh), Fmoc protected amino acids; Fmoc-Gly, Fmoc-Lys(Boc), Fmoc-Ser(Bu<sup>t</sup>), Fmoc-Ile, Fmoc-Cys(Trt), and Fmoc-Cys(dmt), and coupling reagents for solid-state peptide synthesis were purchased from Peptide Institute (Osaka, Japan). Palmitic acid- $d_{31}$  was purchased from Cayman Chemical (MI, U.S.) Myristic acid- $d_{27}$  and deuterium depleted water were obtained from Sigma-Aldrich (MO, U.S.). 10',10'- $d_2$ -POPC was synthesized as described below. POPC, POPS, and POPE were purchased from NOF CORPORATION (Tokyo, Japan) and Avanti Polar Lipids, inc. (AL, U.S.). Other chemicals and solvents were obtained from Nacalai Tesque (Kyoto, Japan) and FujiFilm Wako Pure Chemical (Osaka, Japan). The ESI-FT-MS spectra were collected by Orbitrap XL (Thermo Fisher Scientific, MA, U.S.). Solution NMR was acquired by ECX-400 (JEOL, Tokyo, Japan) and AVANCE neo-700 (Bruker, U.S.).

### Vesicle preparation and $^2\text{H}$ NMR

Multilamellar vesicles (MLVs) for the NMR sample were prepared according to a reported procedure.<sup>1</sup> First, the solution of lipids (20 mg in total) in methanol-chloroform (1:3) was prepared. The organic solvent was removed by an argon gas flow, and the obtained lipid film was further dried for at least 12 h under a high vacuum. The resulting lipid film was hydrated with Milli-Q water (30 times for the weight of the dried lipids) and vortexed at 65°C. The sample was then freeze-thawed several times to give MLVs, and extruded through a 0.1  $\mu\text{m}$  membrane using an extruder (Avanti) to give large unilamellar vesicles (LUVs). The LUVs suspension added an aqueous solution of the peptide (10 mol% of total lipids) was incubated overnight at 30°C, freeze-thawed (10 times), and lyophilized. The lipid film was rehydrated with deuterium-depleted water to be 50% moisture (w/w), and then freeze-thawed several times. The sample was then transferred into a Kel-F insert tube for 4-mm Bruker MAS rotors, and the screw cap of the tube was sealed tight with epoxy glue.

Solid-state  $^2\text{H}$ -NMR spectra were collected with a 400 MHz spectrometer (AVANCEIII 400, Bruker, U.S.) equipped with a  $^2\text{H}$  static probe. To observe the  $^2\text{H}$  quadrupole splitting pattern under the static conditions, a solid-echo pulse sequence was used with a  $90^\circ$  pulse width set to 4.65  $\mu\text{s}$ ; the solid-echo delays were set to 30  $\mu\text{s}$  and 24  $\mu\text{s}$ , and the recycle delay was set to 0.5 s, respectively. The sweep width was set at 250 kHz with 4k data points, and the number of scans was  $\sim 1,200,000$ . FID data was Fourier transformed upon exponential multiplication.

The order parameter ( $S_{\text{CD}}$ ) is highly related to the observed value of the quadrupolar coupling widths ( $\Delta\nu$ ), as in the following equation:<sup>2-3</sup>

$$\Delta\nu = \frac{3}{4} \frac{e^2 q Q}{h} |S_{\text{CD}}| \quad (1)$$

where  $e^2 q Q/h$  is the value of the quadrupolar coupling constant (167 kHz for  $^2\text{H}$  in a C- $^2\text{H}$  segment), and  $S_{\text{CD}}$  corresponds to the chain order parameter for the deuterated methylene positions relative to the principal ordering axis. The  $S_{\text{CD}}$  ranging  $\pm 0.5$  is due to the rotation averaging around the ordering axis

that intersects the C-D bond vector of the methylene segments at  $\theta = 90^\circ$  through scaling by  $(3\cos^2\theta-1)/2$ . The  $S_{CD}$  value of the hydrocarbon chains in the membrane is assumed to have a minus sign.

The  $^2\text{H}$  NMR spectra originating from perdeuterated lipid chains were de-Paked.<sup>4</sup>

The spectral first moment ( $M_1$ ) was obtained according to

$$M_1 = \frac{\int_0^\infty |\omega| f(\omega) d\omega}{\int_0^\infty f(\omega) d\omega} \quad (2)$$

where  $\omega = 2\pi\nu$ ,  $\nu$  is the resonance frequency in Hz, and  $f(\omega)$  indicates the spectral intensity at  $\omega$ .

$M_1$  relates proportionally to the averaged order parameters of the deuterated lipid chains.<sup>5</sup>

*Acyl chain extent obtained from  $S_{CD}$*

The average area per chain ( $A_C$ ) and membranes' volumetric thickness ( $D_C$ ) were obtained using the maximum  $|S_{CD}|$  value of the deuterated chain ( $S_{CD}^{\max}$ ) according to Kinnun et al.,<sup>6</sup>

$$A_C \cong \frac{2V_{\text{CH}_2}}{D_M} \left( \frac{11}{6} - \frac{1}{2} \sqrt{3(-8S_{CD}^{\max} - 1)} - \frac{4}{3} S_{CD}^{\max} \right) \quad (3)$$

$$D_C = \frac{n_c V_{\text{CH}_2}}{A_C} \quad (4)$$

where  $V_{\text{CH}_2}$  is a standard chain volumic area of methylene used  $27.5 \text{ \AA}^2$ <sup>7-8</sup>,  $n_c$  is a carbon number, 16 for palmitoyl chain, by considering  $V_{\text{CH}_3} \approx 2V_{\text{CH}_2}$ <sup>9</sup>, and  $D_M$  is the maximum length of  $C_{i-1}$  and  $C_{i+1}$  used in  $2.54 \text{ \AA}$ . The acyl chain extents ( $L_C$ ) can be obtained by a total extent of the methylenes and terminal methyl  $\langle L_C^i \rangle$  obtained from  $S_{CD}^i$  as follows, according to Vogel et al.<sup>10</sup>.

$$\langle L_C^i \rangle = \frac{1}{2} D_M \langle \cos \beta_i \rangle = \frac{1}{2} D_M \left( \coth \left( \frac{-U_i}{k_B T} \right) + \frac{k_B T}{U_i} \right) \quad (5)$$

Where  $D_M \langle \cos \beta \rangle$  is the average travel of the methylene segment  $i$  along the bilayer normal and  $U_i$  is the first-order mean-torque parameter of each methylene and methyl segment. Since  $\langle \cos^2 \beta \rangle^{1/2}$  is not

$\langle \cos\beta \rangle$ ,  $\langle \cos^2\beta \rangle$  is obtained from the following equations.

$$\langle \cos^2\beta_i \rangle = 1 + 2 \left( \frac{-k_B T}{U_i} \right)^2 + \frac{2k_B T}{U_i} \coth \left( \frac{-U_i}{k_B T} \right) \quad (6)$$

$$\langle \cos^2\beta_i \rangle = \frac{1 - 4S_{CD}^i}{3} \quad (7)$$

The  $S_{CD}^i$  of the methylene group was directly obtained from the  $^2\text{H}$  NMR spectrum, while the terminal methyl group has a three-fold symmetric rotation along with the C- $\text{CD}_3$  bond, leading to  $S_{CD}^i = -3S_{\text{CD}3}$ , along with the cosine of the rotating cone angle in  $109.5^\circ$ <sup>3</sup>. In the approximation of  $\coth(-U/k_B T) \approx 1$  when  $S_{CD}^i$  is small enough (here used  $< -0.14$ ),  $\langle \cos\beta \rangle$  can be obtained as follows.

$$\langle \cos\beta_i \rangle = \frac{1}{2} \left( 1 + \sqrt{\frac{-8S_{CD}^i - 1}{3}} \right) \quad (8)$$

### *Solid-state $^{31}\text{P}$ NMR*

The solid-state  $^{31}\text{P}$ -NMR spectra were collected with a 400 MHz spectrometer. The static  $^{31}\text{P}$ -NMR spectra were collected using a 4.0  $\mu\text{s}$  single  $90^\circ$  pulse with a 4.0 s recycle delay. 70 kHz  $^1\text{H}$  decoupling field was applied with a spinal64 scheme. 1024 scans were taken, and the free induction decay was processed with 100 Hz line-broadening. The spectral width was set to 400 ppm with 4k points. For the spin-lattice ( $T_1$ ) relaxation analysis, the saturation recovery experiment with a 4 kHz magic angle spinning (MAS) rate was employed. Saturation was achieved by a train of  $90^\circ$ -pulse-20 ms-delay for 30 times. The 12 recovery delay points from 5 ms to 5 s were collected with 128 scans. Ammonium dihydrogenphosphate ( $\delta=1.0$  ppm with respect to phosphoric acid (85%): $\delta=0$  ppm) was used as the secondary external reference. The data processing and  $T_1$  analysis were performed using Topspin 4.1.3 (Bruker).

## Synthetic Procedures

### *Myr-Gly-Cys-Ile-Lys-Ser-Lys-Gly-NH<sub>2</sub>* **1**

CLEAR-Amide Resin (208 mg, 0.48 mmol/g) was swelled with DMF (2 mL) for 30 min, and then treated with 20% piperidine/DMF (2 mL) for 5 min and followed 15 min-treatment with the fresh 20% piperidine/DMF (2 mL) to remove the Fmoc group. After rinsing the resin, peptide elongation was achieved in the repetition of the following steps. The coupling cocktail of 0.45 M HBTU in DMF (1.0 mL), including DIEA (0.174 mL) and Fmoc amino acid or myristic acid (0.50 mmol) was added to the resin, and the suspension was vortexed for 60 min at room temperature. After the reaction, the resin was repeatedly rinsed with DMF. The myristoylated peptide on the resin was repeatedly washed with CH<sub>2</sub>Cl<sub>2</sub> and ether, and then dried under reduced pressure overnight to give Myr-Gly-Cys(Trt)-Ile-Lys(Boc)-Ser(Bu<sup>t</sup>)-Lys(Boc)-Gly-NH-Resin (219 mg). A part of the dried resin was treated with TFA cocktail (TFA/TIS/H<sub>2</sub>O = 1900  $\mu$ L: 50  $\mu$ L: 50  $\mu$ L) for 90 min at room temperature. After filtration, TFA was removed by a nitrogen stream, and ether was added to form a precipitate. The precipitate was washed three times with ether and dried in vacuo. The crude peptide was purified by reverse phase HPLC (column; 5C4-AR-300, 4.6 mm I.D.  $\times$  150 mm) to give the peptide **1** (15.0 mg, 16.6  $\mu$ mol, 16%). ESI-MS; m/z calcd C<sub>42</sub>H<sub>80</sub>N<sub>10</sub>O<sub>9</sub>S for [M+H]<sup>+</sup> 901.5909, found 901.5902.

<sup>1</sup>H NMR (700 MHz, CD<sub>3</sub>OD)  $\delta$  8.40 (dd, 1H,  $J$  = 5.8, 5.8 Hz, GlyNH), 8.19-8.12 (m, 5H, Gly7NH, LysNH $\times$ 2, CysNH, IleNH), 8.05 (d, 1H, SerNH), 7.48 (brs, 1H, GlyCONH<sub>2</sub>a), 7.14 (brs, 1H, GlyCONH<sub>2</sub>b), 4.56 (br, 1H, CysC $\alpha$ H), 4.38-4.31 (m, 3H, LysC $\alpha$ H $\times$ 2, SerC $\alpha$ H), 4.12 (dd, 1H,  $J$  = 7.0, 7.0 Hz, IleC $\alpha$ H), 3.96-3.82 (m, 6H, GlyC $\alpha$ H<sub>2</sub> $\times$ 2, Ser C $\beta$ H<sub>2</sub>), 2.98-2.94 (m, 6H, CysC $\beta$ H<sub>2</sub>, LysC $\epsilon$ H<sub>2</sub> $\times$ 2), 2.31 (m, 2H, MyrCH<sub>2</sub>CO), 2.02-1.77 (m, 5H, IleC $\beta$ H, LysC $\beta$ H<sub>2</sub> $\times$ 2), 1.71 (m, 4H, LysC $\delta$ H<sub>2</sub> $\times$ 2), 1.67-1.47 (m, 7H, MyrCH<sub>2</sub>, IleC $\gamma$ Ha, LysC $\gamma$ H<sub>2</sub> $\times$ 2), 1.40-1.25 (m, 21H, Myr, IleC $\gamma$ Hb), 0.99 (d, 3H,  $J$  = 6.9 Hz, IleC $\gamma$ 'Me), 0.96 (dd, 3H,  $J$  = 7.6, 7.6 Hz, IleC $\delta$ Me), 0.93 (t, 3H,  $J$  = 7.1 Hz, Myr-Me).

<sup>13</sup>C NMR (175 MHz, CD<sub>3</sub>OD)  $\delta$  177.5 (Myr), 174.9, 174.7019, 174.6, 174.4, 173.3, 173.2, 172.7



(GlyCONH<sub>2</sub>), 63.0 (Ser C $\beta$ ), 61.0 (Ile C $\alpha$ ), 57.8 (Ser C $\alpha$ ), 57.6 (Cys C $\alpha$ ), 55.5 (<sup>a</sup>Lys C $\alpha$ ), 55.2 (<sup>b</sup>Lys C $\alpha$ ), 44.5 (<sup>a</sup>Gly C $\alpha$ ), 43.4 (<sup>b</sup>Gly C $\alpha$ ), 41.0 (<sup>a</sup>Lys C $\epsilon$ , Lys7 C $\epsilon$ ), 37.3 (Ile C $\beta$ ), 37.0 (myr C2), 33.2, 32.0 (<sup>a</sup>Lys C $\beta$ ), 31.8 (<sup>b</sup>Lys C $\beta$ ), 30.96, 30.95, 30.93, 30.8, 30.7, 30.64, 30.57, 28.3 (<sup>a</sup>Lys C $\delta$ ), 28.25 (<sup>b</sup>Lys C $\delta$ ), 27.0 (Cys C $\beta$ ), 26.9, 26.7, (Ile C $\beta$ ), 24.0, 23.9 (<sup>a</sup>Lys C $\gamma$ ), 23.8 (<sup>b</sup>Lys C $\gamma$ ), 16.2 (Ile C $\gamma'$ ), 14.6, 11.5 (Ile C $\delta$ ).

*d*<sub>27</sub>Myr-Gly-Cys-Ile-Lys-Ser-Lys-Gly-NH<sub>2</sub> (**2**)

Peptide **2** was synthesized on the same scale in a similar manner as **1**, except for using *d*<sub>27</sub>-myristic acid. The crude peptide was purified by HPLC to give **2** (24.9 mg, 26.8  $\mu$ mol, 27%). ESI-MS; m/z calcd C<sub>42</sub>H<sub>53</sub>D<sub>27</sub>N<sub>10</sub>O<sub>9</sub>S for [M+H]<sup>+</sup> 928.7603, found 929.7596.

*Myr-Gly-Cys(Pal)-Ile-Lys-Ser-Lys-Gly-NH<sub>2</sub>* (**3**)

Myr-Gly-Cys(Mmt)-Ile-Lys(Boc)-Ser(Bu<sup>t</sup>)-Lys(Boc)-Gly-NH-Resin was similarly prepared on the same scale as the peptide **1** except for using Fmoc-Cys(Mmt). After washing several times with CH<sub>2</sub>Cl<sub>2</sub>, The Mmt group was removed by a cocktail of 5%TIS/1%TFA/CH<sub>2</sub>Cl<sub>2</sub> (1 mL). After repeating cycles of the 3-min treatment and DMF wash until the orange-yellow color disappeared (required about 10 cycles), the coupling cocktail of 0.45 M HATU in DMF (10 mL), including DIEA (0.174 mL) and palmitic acid (128 mg, 0.50 mmol), was added and the reaction mixture was vortexed overnight at room temperature. After the reaction, the resin was washed with CH<sub>2</sub>Cl<sub>2</sub> and ether, and dried overnight under reduced pressure to give Myr-Gly-Cys(Pal)-Ile-Lys(Boc)-Ser(Bu<sup>t</sup>)-Lys(Boc)-Gly-OH-Resin (302 mg). The dried resin was treated with TFA cocktail (TFA/TIS/H<sub>2</sub>O = 2850  $\mu$ L: 75  $\mu$ L: 75  $\mu$ L) for 90 min at room temperature. After filtration, TFA was removed by a nitrogen stream, and ether was added to form a precipitate. The precipitate was washed three times with ether and dried in vacuo. The crude peptide was purified by reverse phase HPLC (column; 5C4-AR-300, 4.6 mmI.D.×150 mm) to give the peptide **3** (5.0 mg, 4.38  $\mu$ mol, 9.5%). ESI-MS; m/z calcd C<sub>58</sub>H<sub>110</sub>N<sub>10</sub>O<sub>10</sub>S for [M+H]<sup>+</sup>

1139.8205, found 1139.8206.

$^1\text{H}$  NMR (700 MHz,  $\text{CD}_3\text{OD}$ )  $\delta$  8.45 (dd, 1H,  $J = 6.2, 6.2$  Hz, Gly2NH), 8.22 (brd, 1H,  $J = 6.5$  Hz, CysNH), 8.19 (brdd, 1H,  $J = 6.2, 6.2$  Hz, GlyNH), 8.16-8.13 (m, 2H, LysNH  $\times 2$ ), 8.02 (brd, 1H,  $J = 6.4$  Hz, IleNH), 7.99 (brd, 1H,  $J = 7.6$  Hz, IleNH), 7.48 (brs, 1H, GlyCONH<sub>2a</sub>), 7.12 (brs, 1H, GlyCONH<sub>2b</sub>), 4.54 (m, 1H, CysC $\alpha$ H), 4.39-4.33 (m, 3H, LysC $\alpha$ H $\times 2$ , SerC $\alpha$ H), 4.11 (brd, 1H,  $J = 8.05$  Hz, IleC $\alpha$ H), 3.96-3.82 (m, 6H, GlyC $\alpha$ H $\times 2$ , Ser C $\beta$ H<sub>2</sub>), 3.43 (dd, 1H,  $J = 14.6, 3.7$  Hz, CysC $\beta$ H<sub>2a</sub>), 3.27 (dd, 1H,  $J = 14.6, 9.0$  Hz, CysC $\beta$ H<sub>2a</sub>), 2.98 (m, 4H, LysC $\epsilon$ H $\times 2$ ), 2.66 (dd, 2H,  $J = 7.4, 7.4$  Hz, S-COCH<sub>2</sub>), 2.35 (dd, 2H,  $J = 7.6, 7.6$  Hz, NHCOCH<sub>2</sub>), 2.03-1.91 (m, 5H, IleC $\beta$ H, LysC $\beta$ H $\times 2$ ), 1.72 (m, 4H, LysC $\delta$ H $\times 2$ ), 1.69-1.48 (m, 9H, MyrCH<sub>2</sub>, PalCH<sub>2</sub>, IleC $\gamma$ Ha, LysC $\gamma$ H $\times 2$ ), 1.42-1.24 (m, 45H, Myr, Pal, IleC $\gamma$ Hb), 0.99 (d, 3H,  $J = 6.5$  Hz, IleC $\gamma$ 'Me), 0.96 (dd, 3H,  $J = 7.5, 7.5$  Hz, IleC $\delta$ Me), 0.94 (dd, 6H,  $J = 7.5, 7.5$  Hz, Myr-Me, Pal-Me).

$^{13}\text{C}$  NMR (175 MHz,  $\text{CD}_3\text{OD}$ )  $\delta$  202.2 (SC(=O)-Pal), 177.7 (NH C(=O)-Myr), 175.0, 174.6 ( $\times 2$ ), 174.5, 173.2 ( $\times 2$ ), 173.1, 62.9 (Ser C $\beta$ ), 60.9 (Ile C $\alpha$ ), 57.7 (Ser C $\alpha$ ), 56.2 (Cys C $\alpha$ ), 55.4 ( $^a$ Lys C $\alpha$ ), 55.1 ( $^b$ Lys C $\alpha$ ), 45.1 (SCOCH<sub>2</sub>-), 44.7 ( $^a$ Gly C $\alpha$ ), 43.4 ( $^b$ Gly C $\alpha$ ), 40.8 (LysC $\epsilon \times 2$ ), 37.4 (Ile C $\beta$ ), 37.1 (myr C<sub>2</sub>), 33.3, 32.0 ( $^a$ Lys C $\beta$ ), 31.8 ( $^b$ Lys C $\beta$ ), 31.1 (Cys C $\beta$ ), 31.0, 30.9, 30.8, 30.75, 30.71, 30.3, 28.2 ( $^a$ LysC $\delta$ ), 28.1 ( $^b$ Lys C $\delta$ ), 27.0, 26.8 (Ile C $\beta$ ), 24.0, 23.97 ( $^a$ Lys C $\gamma$ ), 23.94 ( $^b$ Lys C $\gamma$ ), 16.3 (Ile C $\gamma$ '), 14.7 (myr), 11.6 (Ile C $\delta$ ).

*d*<sub>27</sub>Myr-Gly-Cys(Pal)-Ile-Lys-Ser-Lys-Gly- NH<sub>2</sub> (**4**)

The peptide **4** was synthesized on the same scale in the similar manner as **3**, except for using *d*<sub>27</sub>-myristic acid. The crude peptide was purified by HPLC to give **4** (6.7 mg, 5.74  $\mu\text{mol}$ , 5.7%). ESI-MS;  $m/z$  calcd C<sub>58</sub>H<sub>83</sub>D<sub>27</sub>N<sub>10</sub>O<sub>10</sub>S for  $[\text{M}+\text{H}]^+$  1166.9900, found 1166.99.

Myr-Gly-Cys(*d*<sub>31</sub>Pal)-Ile-Lys-Ser-Lys-Gly- NH<sub>2</sub> (**5**)

The peptide **5** was synthesized on the same scale in a similar manner as **3**, except for using *d*<sub>31</sub>-palmitic

acid. The crude peptide was purified by HPLC to give **5** (6.8 mg, 5.80  $\mu\text{mol}$ , 5.8%). ESI-MS;  $m/z$  calcd C<sub>58</sub>H<sub>79</sub>D<sub>31</sub>N<sub>10</sub>O<sub>10</sub>S for  $[\text{M}+\text{H}]^+$  1171.0151, found 1172.0143.

### Synthesis of 10',10'-d<sub>2</sub>-POPC

10,10-d<sub>2</sub>-palmitic acid **7** was synthesized from sebacic acid monomethyl ester in a similar procedure as reported previously.<sup>11</sup> As shown in Scheme 1, Lyso-OPC **9** was prepared from commercial POPC **8** by selective hydrolyzation using Lipozyme® (*Mucor miehei*) in ethanol/H<sub>2</sub>O solution<sup>12</sup> (Scheme 2). Following esterification of **9** with the 10,10-d<sub>2</sub>-palmitic acid **7** produced 10',10'-d<sub>2</sub>-POPC **10**.

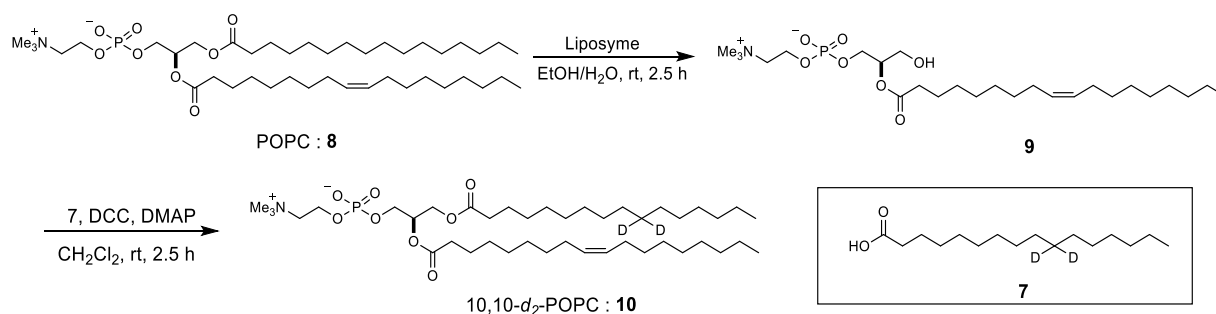

Scheme 1. Synthesis of 10',10'-d<sub>2</sub>-POPC

### 2-Oleoyl-*sn*-glycero-3-phosphocholine **9**

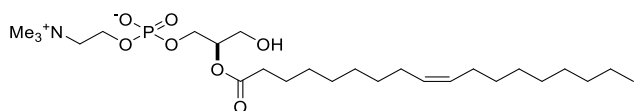

To a solution of POPC (72.3 mg, 0.095 mmol) in ethanol (0.9 mL) and water (0.1 mL) added Lipozyme (Sigma-Aldrich: 134 mg) was stirred for 2.5 h at room temperature while keeping the pH between 5 to 7. The mixture was then filtered and evaporated. The residue was purified with SiO<sub>2</sub> chromatography (chloroform/methanol/H<sub>2</sub>O 65:25:4) to give lyso-OPC **9** (36.4 mg, 0.070 mmol, 73%) as a white solid. **9**: colorless oil;  $R_f = 0.01$  (silica gel, chloroform/methanol/water = 65/25/4); <sup>1</sup>H NMR (500 MHz,

CDCl<sub>3</sub>) δ 5.33 (2H, m), 4.90 (1H, m), 4.30 (2H, br), 4.01 (1H, br), 3.94 (1H, br), 3.80 (2H, br), 3.66 (2H, br), 3.34 (9H, s), 2.28 (2H, t, *J* = 7.8 Hz), 2.00 (4H, m), 1.55 (2H, m), 1.25 (20H, m), 0.87 (3H, t, *J* = 7.0 Hz); <sup>13</sup>C NMR (125 MHz, CDCl<sub>3</sub>) δ 173.2, 129.9, 129.6, 73.2, 66.0, 62.9, 59.6, 59.2, 54.1, 34.2, 31.8, 29.6, 29.4, 29.2, 29.1, 27.1, 24.8, 22.5, 14.0; ESI-MS (positive mode); *m/z* calcd for [C<sub>26</sub>H<sub>52</sub>NO<sub>7</sub>P + Na]<sup>+</sup> 544.3481, found 544.3376.

*1-O-(10,10-d<sub>2</sub>-palmitoyl)-2-O-oleoyl-sn-glycero-3-phosphocholine 10*

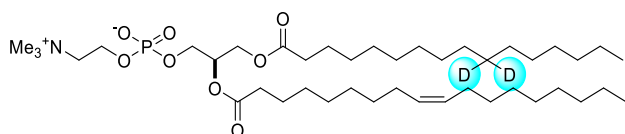

To a solution of lyso-OPC **9** (22.9 mg, 0.044 mmol) and 10,10-*d*<sub>2</sub>-palmitic acid<sup>11</sup> (27.5 mg, 0.107 mmol) in dry CH<sub>2</sub>Cl<sub>2</sub> (0.5 mL) added DCC (32.4 mg, 0.157 mmol) and a catalytic amount of DMAP was stirred for 2.5 h at room temperature, and then the solvent was evaporated. The residue was purified with SiO<sub>2</sub> chromatography (chloroform/methanol/H<sub>2</sub>O 65:25:4) to give 10',10'-*d*<sub>2</sub>-POPC **10** (23.6 mg, 0.031 mmol, 70%).

**10** : pale yellow oil; *R*<sub>f</sub> = 0.20 (silica gel, chloroform/methanol/water = 65/25/4); <sup>1</sup>H NMR (500 MHz, CDCl<sub>3</sub>) δ 5.33 (2H, m), 5.20 (1H, br), 4.49 (1H, dd, *J* = 11.5 Hz, 2.8 Hz), 4.31 (2H, br), 4.12 (1H, dd, *J* = 12.0 Hz, 7.3 Hz), 3.94 (2H, m), 3.82 (2H, br), 3.38 (9H, s), 2.27 (4H, m, H<sub>2</sub>), 2.00 (4H, m), 1.56 (4H, m), 1.25 (42H, m), 0.87 (3H, t, *J* = 6.8 Hz); <sup>13</sup>C NMR (125 MHz, CDCl<sub>3</sub>) δ 173.4, 173.1, 129.8, 129.5, 70.3, 66.2, 63.3, 62.9, 59.3, 54.2, 34.2, 34.0, 31.8, 29.6-29.4, 29.2- 29.0, 27.1, 24.8, 22.5, 14.0; ESI-MS (positive mode); *m/z* calcd for [C<sub>42</sub>H<sub>80</sub>D<sub>2</sub>NO<sub>8</sub>P + Na]<sup>+</sup> 784.5904, found 784.5795.

## References

1. Scheidt, H. A.; Huster, D., Structure and dynamics of the myristoyl lipid modification of SRC peptides determined by 2H solid-state NMR spectroscopy. *Biophys J* **2009**, *96* (9), 3663-72.

2. Molugu, T. R.; Lee, S.; Brown, M. F., Concepts and Methods of Solid-State NMR Spectroscopy Applied to Biomembranes. *Chem Rev* **2017**, *117*(19), 12087-12132.
3. Seelig, J., Deuterium magnetic resonance: theory and application to lipid membranes. *Quarterly Reviews of Biophysics* **1977**, *10* (3), 353-418.
4. EDWARD STERNIN; MYER BLOOM; MACKAY, A. L., De-Pake-ing of NMR Spectra. *JOURNAL OF MAGNETIC RESONANCE* **1983**, *55*, 214-282.
5. Polozov, I. V.; Gawrisch, K., NMR Detection of Lipid Domains. In *Lipid Rafts*, McIntosh, T. J., Ed. Humana Press: Totowa, NJ, 2007; pp 107-126.
6. Kinnun, J. J.; Mallikarjunaiah, K. J.; Petrache, H. I.; Brown, M. F., Elastic deformation and area per lipid of membranes: atomistic view from solid-state deuterium NMR spectroscopy. *Biochim Biophys Acta* **2015**, *1848* (1 Pt B), 246-59.
7. Armen, R. S. U., O. D.; Feller, S. E., Phospholipid Component Volumes: Determination and Application to Bilayer Structure Calculations. *Biophys. J.* **1998**, *75*, 734-744.
8. Tim Bartels, T. L., R. S.; Bittman, R.; Beyer, K.; Brown, M. F., Raftlike Mixtures of Sphingomyelin and Cholesterol Investigated by Solid-State <sup>2</sup>H NMR Spectroscopy. *J. Am. Chem. Soc.* **2008**, *130* (2), 14521-14532.
9. Leftin, A.; Molugu, T. R.; Job, C.; Beyer, K.; Brown, M. F., Area per lipid and cholesterol interactions in membranes from separated local-field (<sup>13</sup>C) NMR spectroscopy. *Biophys J* **2014**, *107*(10), 2274-86.
10. Vogel, A.; Katzka, C. P.; Waldmann, H.; Arnold, K.; Brown, M. F.; Huster, D., Lipid modifications of a Ras peptide exhibit altered packing and mobility versus host membrane as detected by <sup>2</sup>H solid-state NMR. *J Am Chem Soc* **2005**, *127*(35), 12263-12272.
11. Matsumori, N.; Yasuda, T.; Okazaki, H.; Suzuki, T.; Yamaguchi, T.; Tsuchikawa, H.; Doi, M.; Oishi, T.; Murata, M., Comprehensive Molecular Motion Capture for Sphingomyelin by Site-Specific Deuterium Labeling. *Biochemistry* **2012**, *51* (42), 8363-8370.
12. Crauste, C.; Vigor, C.; Brabet, P.; Picq, M.; Lagarde, M.; Hamel, C.; Durand, T.; Vercauteren, J., Synthesis and Evaluation of Polyunsaturated Fatty Acid-Phenol Conjugates as Anti-Carbonyl-Stress Lipophenols. *Eur J Org Chem* **2014**, *2014* (21), 4548-4561.



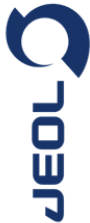

Filename = am-1-89\_carbon-1-2.jdf  
Author = Murata\_jnp  
Experiment = carbon\_jnp  
Sample\_Id = am-1-89  
Solvent = CHLOROFORM-D  
Actual\_Start\_Time = 7-APR-2018 17:12:41  
Revision\_Time = 6-JAN-2020 17:29:05  
Comment = single pulse decoupled ga  
Data\_Format = 1D COMPLEX  
Dm\_Size = 26214  
X\_Domain = Carbon  
Dm\_Title = Carbon13  
Dm\_Units = [ppm]  
Dimensions = X  
Site = ECA 500  
Spectrometer = DELTA2\_NMR  
Field\_Strength = 11.7473579 [T] (500 [MHz])  
X\_Acq\_Duration = 0.83361792 [s]  
X\_Domain = 13C  
X\_Freq = 125.76529768 [MHz]  
X\_Offset = 100 [ppm]  
X\_Points = 32768  
X\_Prescans = 4  
X\_Resolution = 1.19959034 [Hz]  
X\_Sweep = 39.3081761 [kHz]  
X\_Sweep\_Clippped = 31.44654088 [kHz]  
Irr\_Domain = Proton  
Irr\_Freq = 500.15991521 [MHz]  
Irr\_Offset = 5.0 [ppm]  
Clipped = FALSE  
Scans = 783  
Total\_Scans = 783  
Relaxation\_Delay = 2 [s]  
Recvr\_Gain = 58  
Temp\_Get = 25 [dC]  
X\_90\_Width = 11.3 [us]  
X\_Acq\_Time = 0.83361792 [s]  
X\_Angle = 30 [deg]  
X\_Atn = 7.7 [dB]  
X\_Pulse = 3.76666667 [us]  
Irr\_Atn\_Dec = 20.5 [dB]  
Irr\_Atn\_Noise = 20.5 [dB]  
Irr\_Noise = WARRT  
Irr\_Width = 92 [us]  
Decoupling = TRUE  
Initial\_Wait = 1 [s]  
Noe = TRUE  
Repetition\_Time = 2 [s]  
Repetition\_Time = 2.83361792 [s]

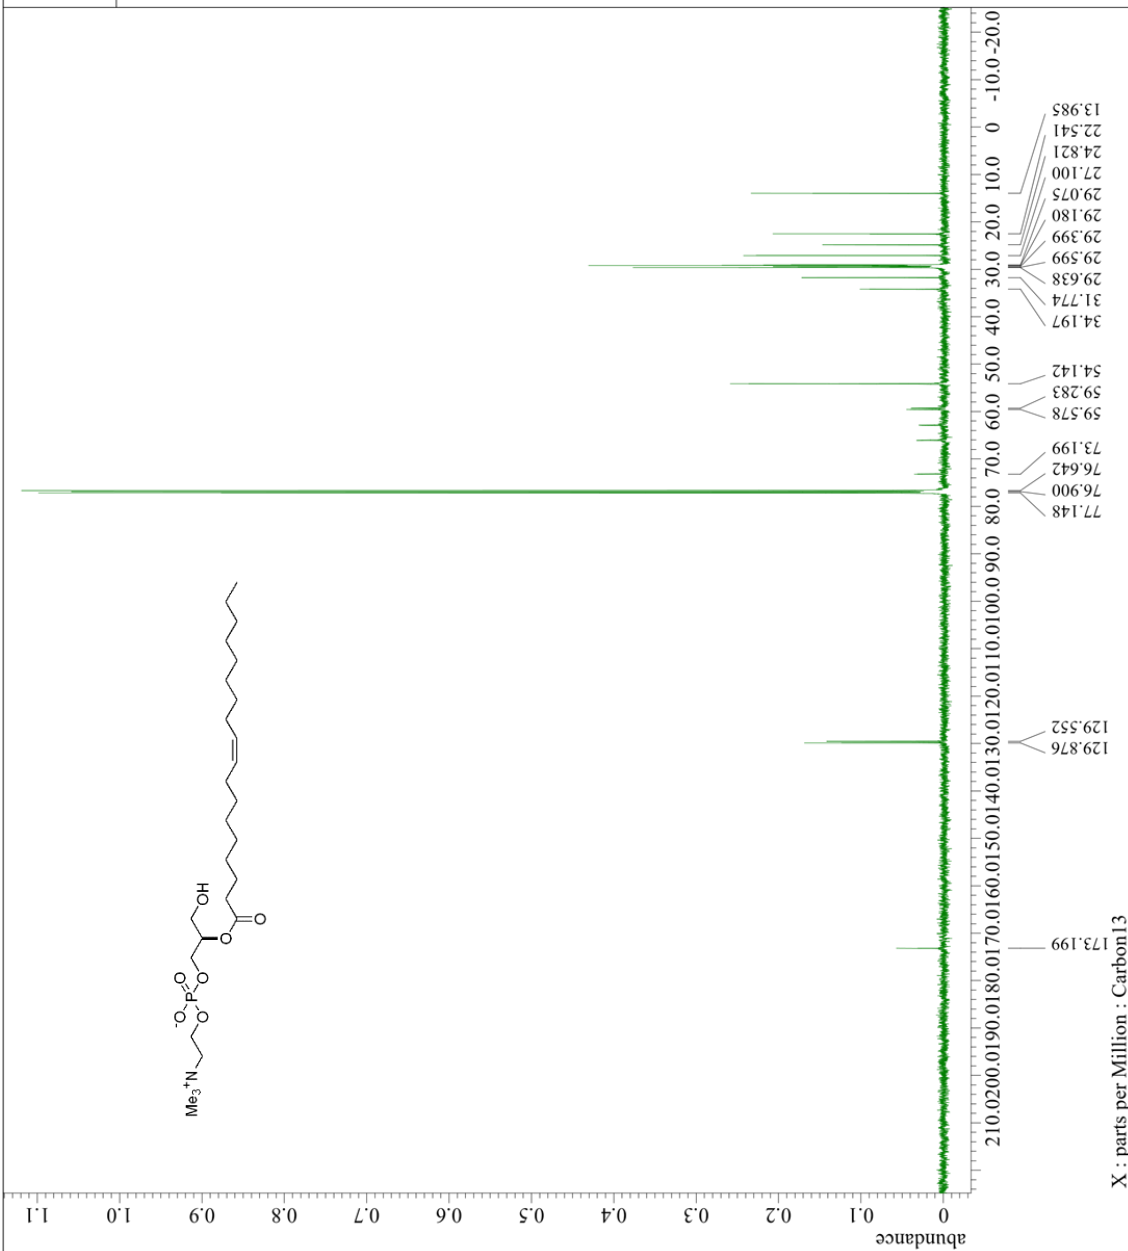

X : parts per Million : Carbon13

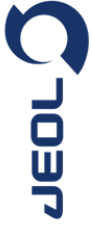

File Name = am-1-163-f2\_proton-2-2.jd  
Author = Murata  
Experiment = proton\_jmp  
Sample Id = am-1-163-f2  
Solvent = CHLOROFORM-D  
Actual\_Start\_Time = 21-MAY-2019 11:06:40  
Revision\_Time = 6-JAN-2020 17:44:46

Comment = single\_pulse  
Data\_Format = 1D COMPLEX  
Dim\_Size = 52429  
X\_Domain = Proton  
Dim\_Title = Proton  
Dim\_Units = [ppm]  
Dimensions = X  
Site = ECA 500  
Spectrometer = DELTA2\_NMR

Field Strength = 11.7473579[T] (500 [MHz])  
X\_Acq\_Duration = 6.98351616[s]  
X\_Domain = 1H  
X\_Freq = 500.15991521[MHz]  
X\_Offset = 5.0[ppm]  
X\_Points = 65536  
X\_Prescans = 1  
X\_Resolution = 0.14319434[Hz]  
X\_Sweep = 9.38438498[MHz]  
X\_Sweep\_Clippped = 7.50750751[MHz]  
Irr\_Domain = Proton  
Irr\_Freq = 500.15991521[MHz]  
Irr\_Offset = 5.0[ppm]  
Tri\_Domain = Proton  
Tri\_Freq = 500.15991521[MHz]  
Tri\_Offset = 5.0[ppm]  
Clipped = FALSE  
Scans = 24  
Total\_Scans = 24

Relaxation\_Delay = 5[s]  
Recvr\_Gain = 34  
Temp\_Get = 25[dc]  
X\_90\_Width = 13.1[us]  
X\_Acq\_Time = 6.98351616[s]  
X\_Angle = 45[deg]  
X\_Atn = 4[db]  
X\_Pulse = 6.55[us]  
Irr\_Mode = Off  
Tri\_Mode = Off  
Dante\_Preset = FALSE  
Initial\_Wait = 1[s]  
Repetition\_Time = 11.98351616[s]

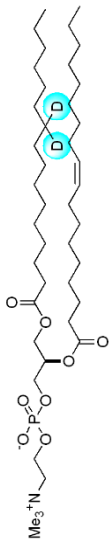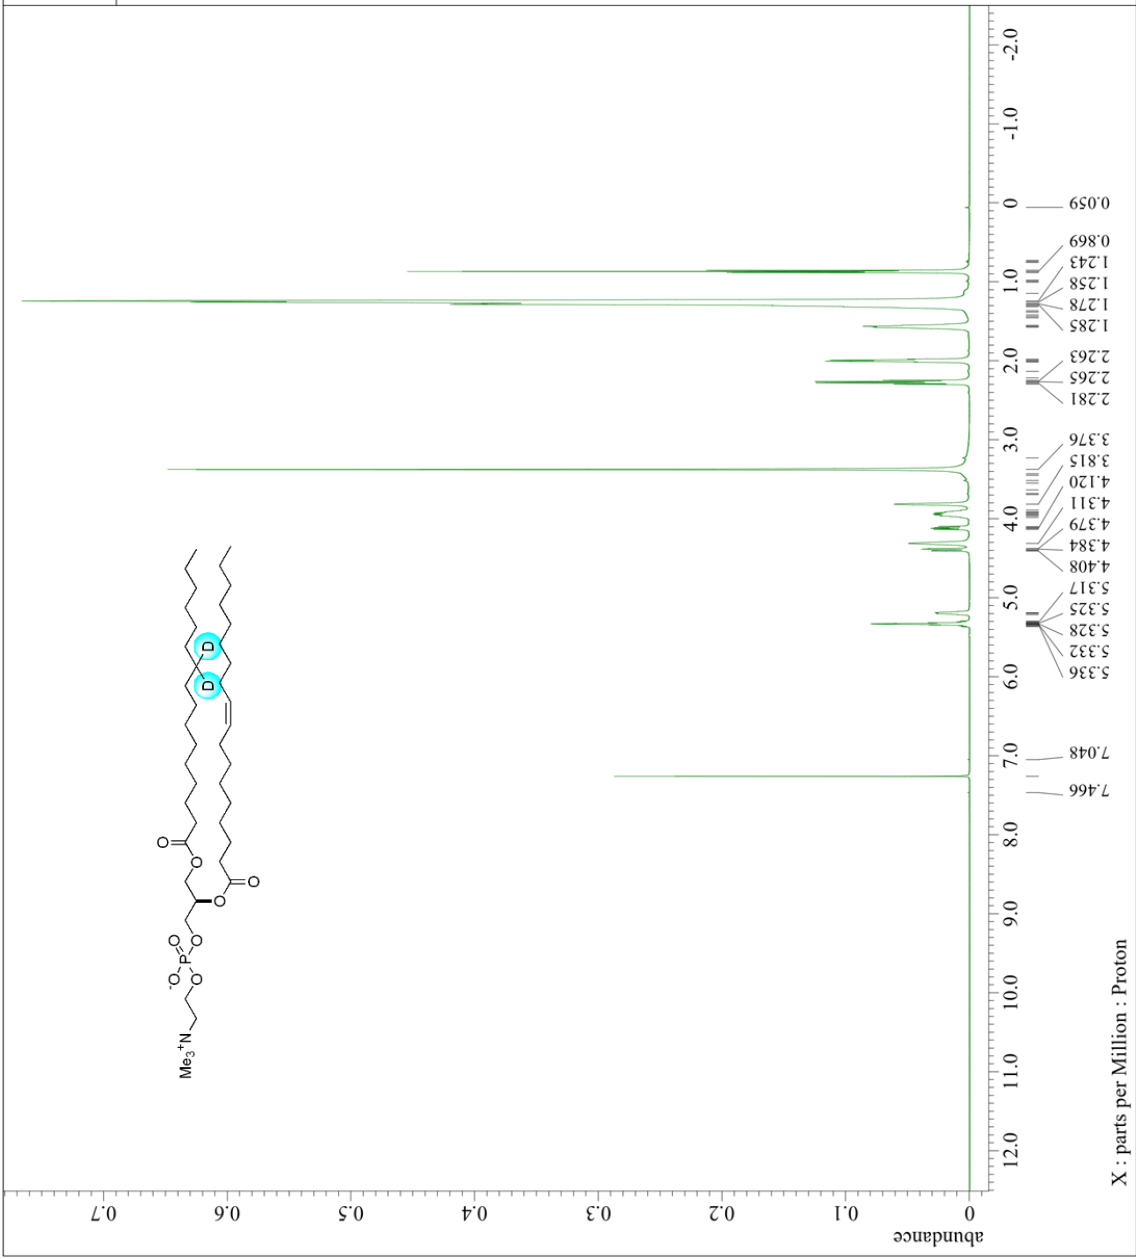

X : parts per Million : Proton



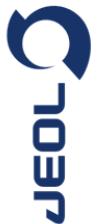

Filename = an-1-93\_carbon-1-2.jdf  
Author = Murata  
Experiment = carbon.jpg  
Sample\_Id = an-1-93  
Solvent = CHLOROFORM-D  
Actual\_Start\_Time = 9-APR-2018 20:24:40  
Revision\_Time = 6-JAN-2020 17:27:23  
Comment = single pulse decoupled ga  
Data\_Format = 1D COMPLEX  
Dim\_Size = 26214  
X\_Domain = Carbon  
Dim\_Title = Carbon13  
Dim\_Units = [ppm]  
Dimensions = X  
Site = ECA 500  
Spectrometer = DELTA2\_NMR  
Field\_Strength = 11.7473579[T] (500 [MHz])  
X\_Acq\_Duration = 0.83361792[s]  
X\_Domain = 13C  
X\_Freq = 125.76529768 [MHz]  
X\_Offset = 100 [ppm]  
X\_Points = 32768  
X\_Prescans = 4  
X\_Resolution = 1.19959034 [Hz]  
X\_Sweep = 39.3081761 [kHz]  
X\_Sweep\_Clipped = 31.44654086 [MHz]  
Irr\_Domain = Proton  
Irr\_Freq = 500.15991521 [MHz]  
Irr\_Offset = 5.0 [ppm]  
Clipped = FALSE  
Scans = 748  
Total\_Scans = 748  
Relaxation\_Delay = 2 [s]  
Recvr\_Gain = 58  
Temp\_Get = 25 [dC]  
X\_90\_Width = 11.3 [us]  
X\_Acq\_Time = 0.83361792 [s]  
X\_Angle = 30 [deg]  
X\_Atn = 7.7 [dB]  
X\_Pulse = 3.76666667 [us]  
Irr\_Atn\_Dec = 20.5 [dB]  
Irr\_Atn\_Noise = 20.5 [dB]  
WALTZ = WALTZ  
Irr\_Pwidth = 92 [us]  
Decoupling = TRUE  
Initial\_Wait = 1 [s]  
Noe = TRUE  
Noe\_Time = 2 [s]  
Repetition\_Time = 2.83361792 [s]

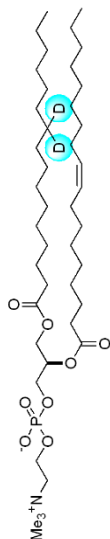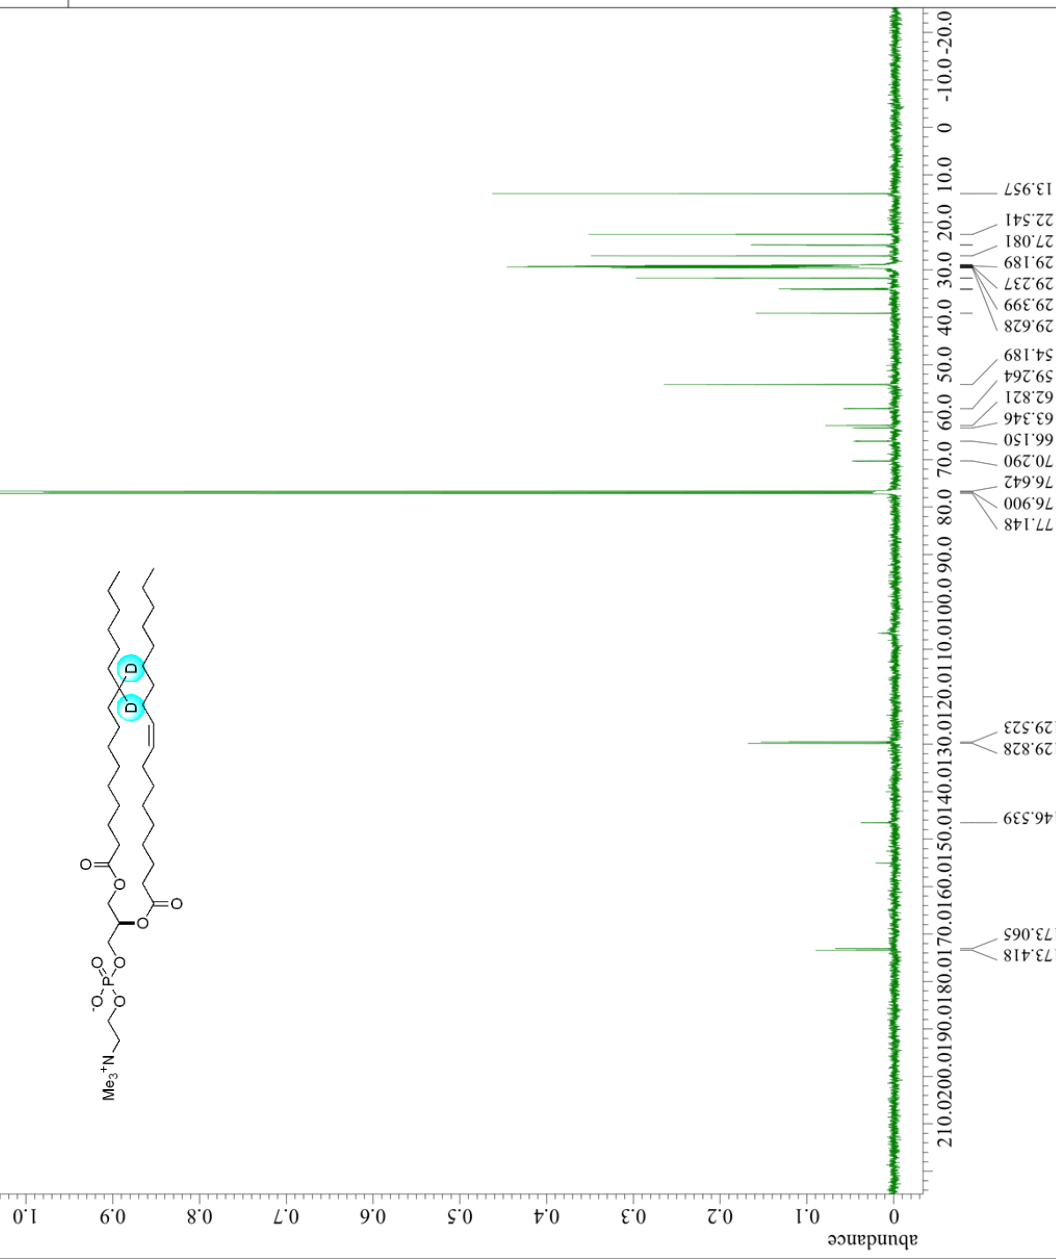

X : parts per Million : Carbon13





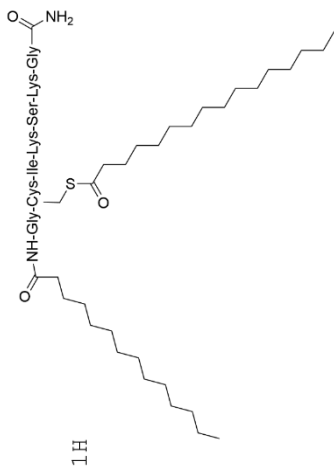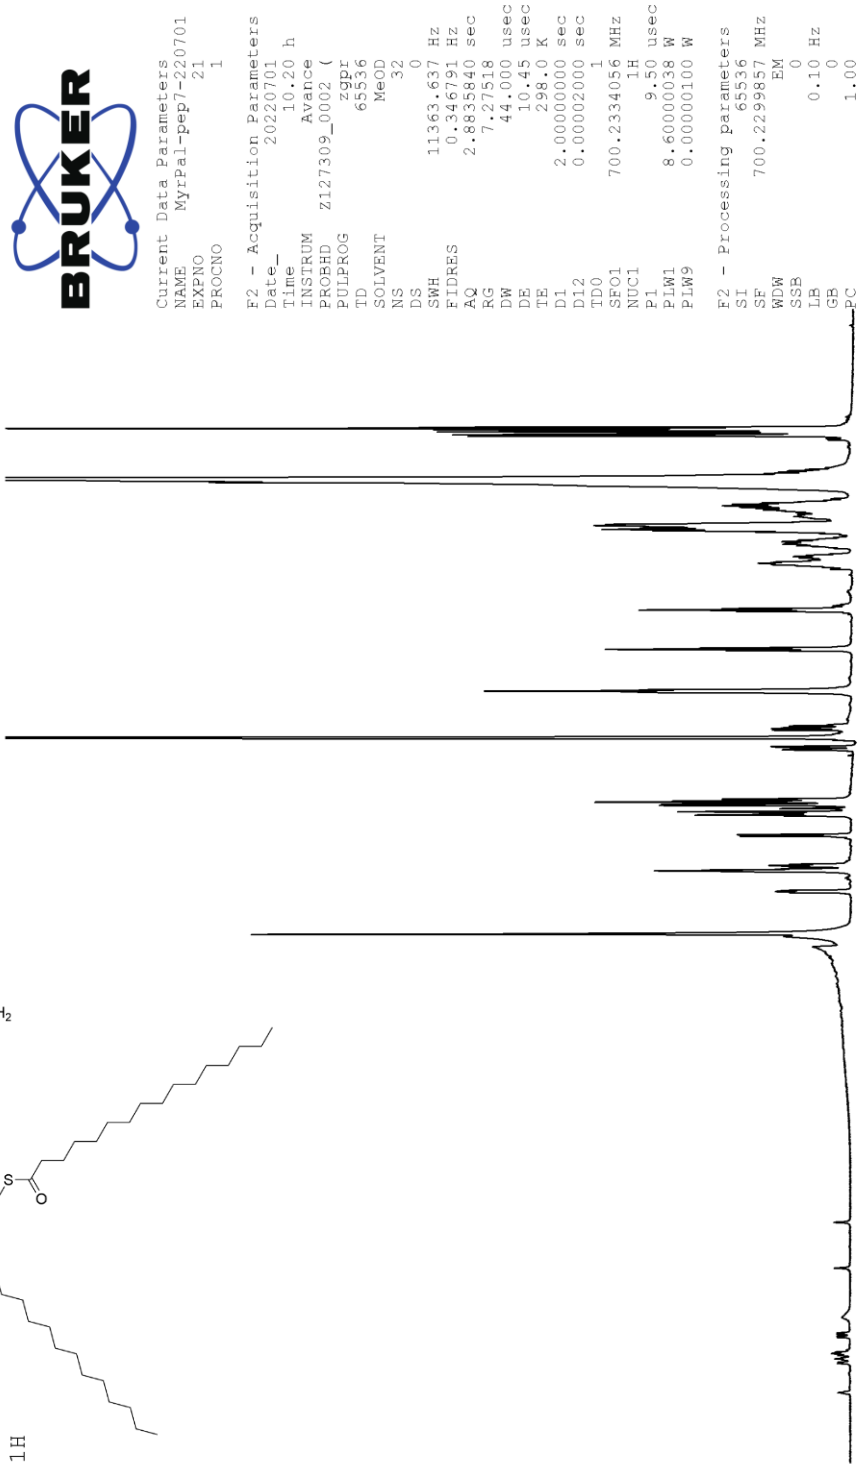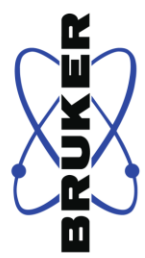

Current Data Parameters  
 NAME MyrPal-pep7-220701  
 EXPNO 21  
 PROCNO 1

F2 - Acquisition Parameters  
 Date\_ 20220701  
 Time 10.20 h  
 INSTRUM Avance  
 PROBHD Z127309\_0002 (zgr)  
 PULPROG zgpg  
 ID 65536  
 SOLVENT MeOD  
 NS 32  
 DS 0  
 SWH 11363.637 Hz  
 FIDRES 0.346791 Hz  
 AQ 2.8835840 sec  
 RG 7.27518  
 DW 44.000 usec  
 DE 10.45 usec  
 TE 298.0 K  
 D1 2.00000000 sec  
 D12 0.00002000 sec  
 TDO 1  
 SFO1 700.2334056 MHz  
 NUC1 1H  
 P1 9.50 usec  
 PLW1 8.60000038 W  
 PLW9 0.00000100 W

F2 - Processing parameters  
 SI 65536  
 SF 700.2299857 MHz  
 WDW EM  
 SSB 0  
 LB 0.10 Hz  
 GB 0  
 PC 1.00

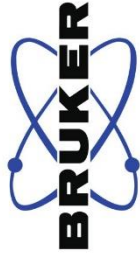

Current Data Parameters  
NAME MyrPal-pep7-220701  
EXPNO 101  
PROCNO 1

F2 - Acquisition Parameters  
Date\_ 20220704  
Time\_ 8.28 h

INSTRUM Avance  
PROBHD Z127309\_3002 (79pg30)  
TD 65536  
SOLVENT MeOD  
NS 38128  
DS 8  
SWH 35714.285 Hz  
FIDRES 1.089913 Hz  
AQ 0.9175040 sec  
RG 101  
DW 14.000 usec  
DE 18.000 usec  
TE 298.0 K  
D1 3.00000000 sec  
D11 0.03000000 sec  
TD0 1  
SFO1 176.0905808 MHz  
NUC1 13C  
PC 4.00 usec  
P1 12.00 usec  
PLW1 127.87999725 W  
SFO2 700.2328009 MHz  
NUC2 1H  
CPDPRG2 waltz65  
PCPD2 65.00 usec  
PLW2 8.60000038 W  
PLW12 0.15054999 W  
PLW13 0.07560800 W

F2 - Processing Parameters  
SI 32768  
SF 176.0726786 MHz  
WDW EM  
SSB 0  
LB 2.00 Hz  
GB 0  
PC 1.40

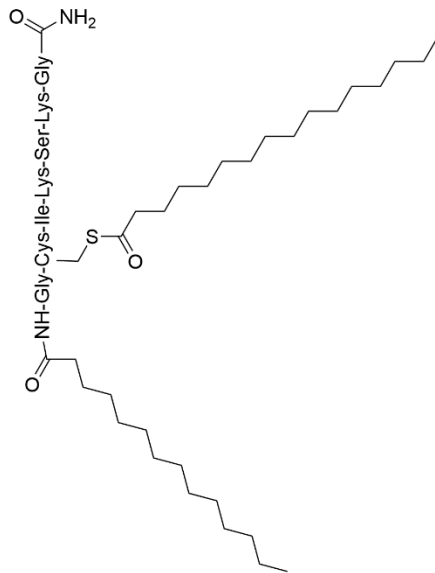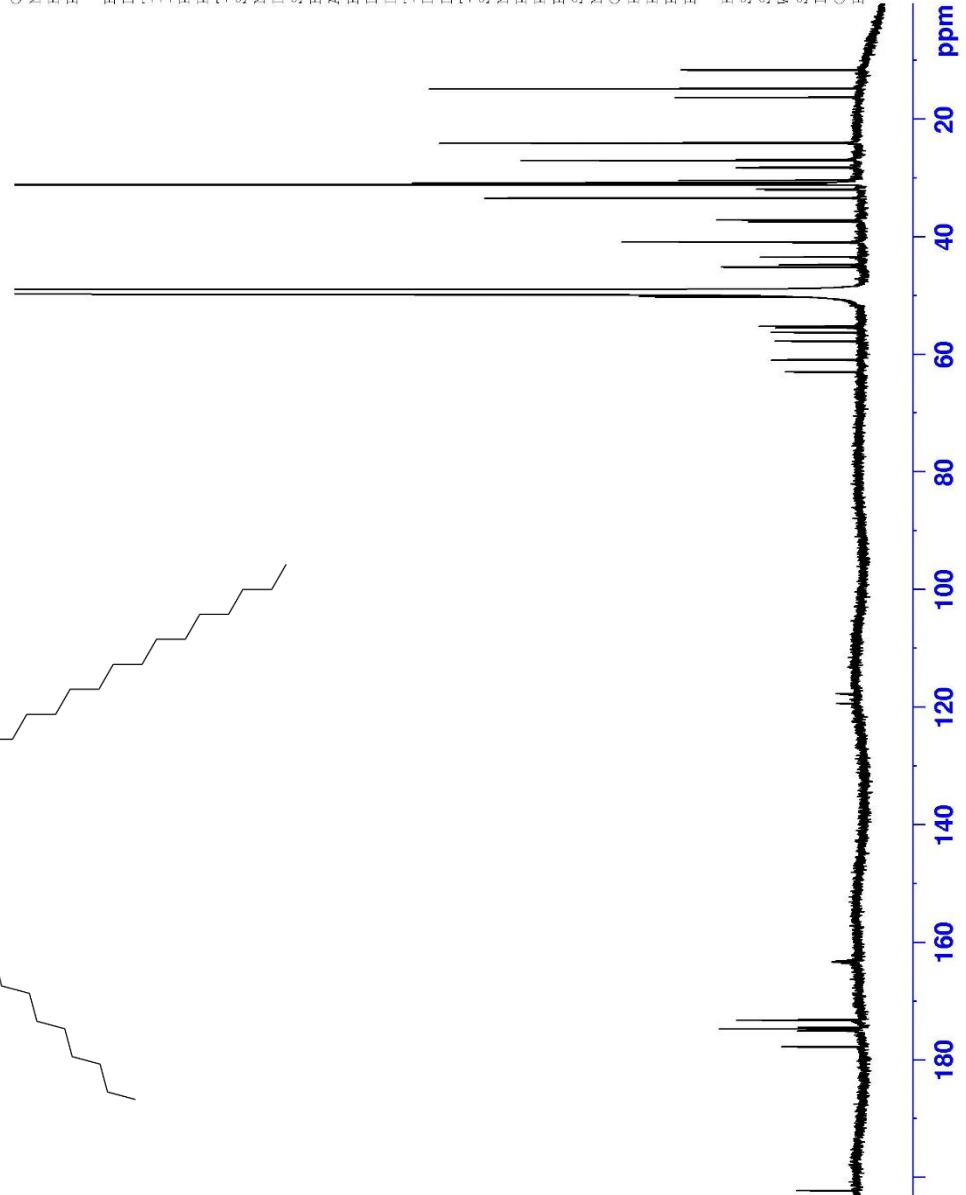

Supplement: d2ob01079h1.pdf [file d2ob01079h1.pdf]
